# Supplementary material
Source: PubMed Central journal article supplement (PMC4567961)

Figure S4

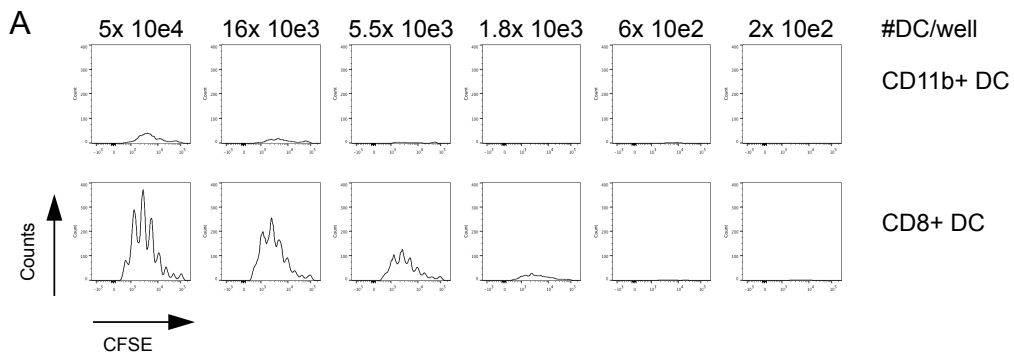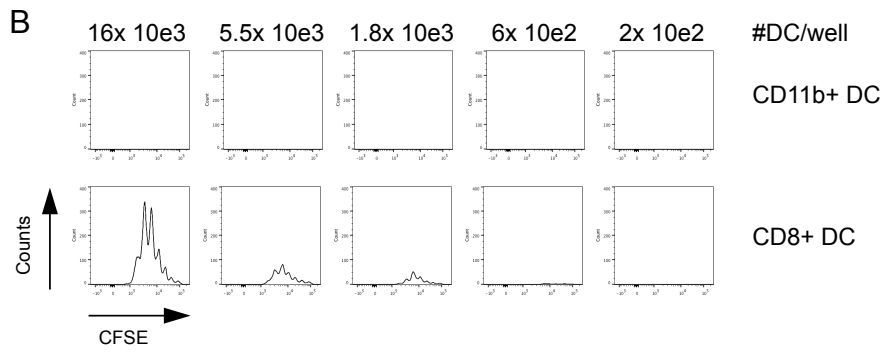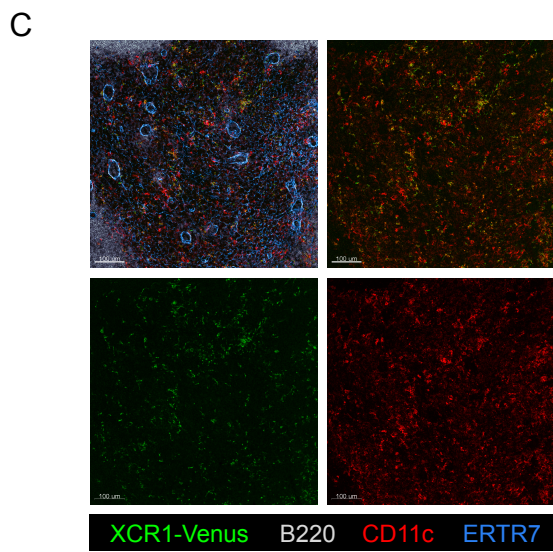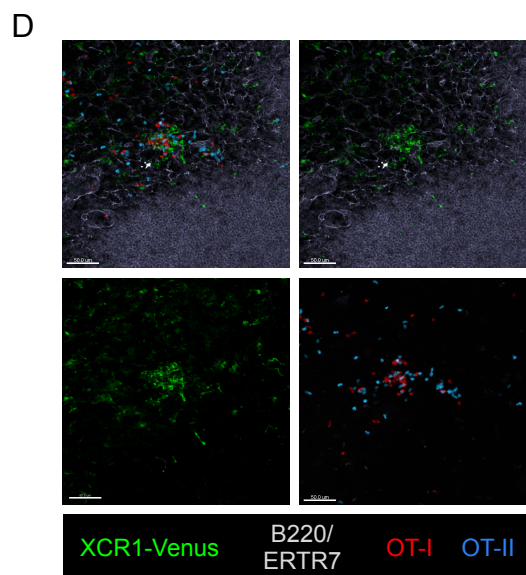

Supplement: NIHMS713704-supplement-10.pdf [file NIHMS713704-supplement-10.pdf]

Figure S5

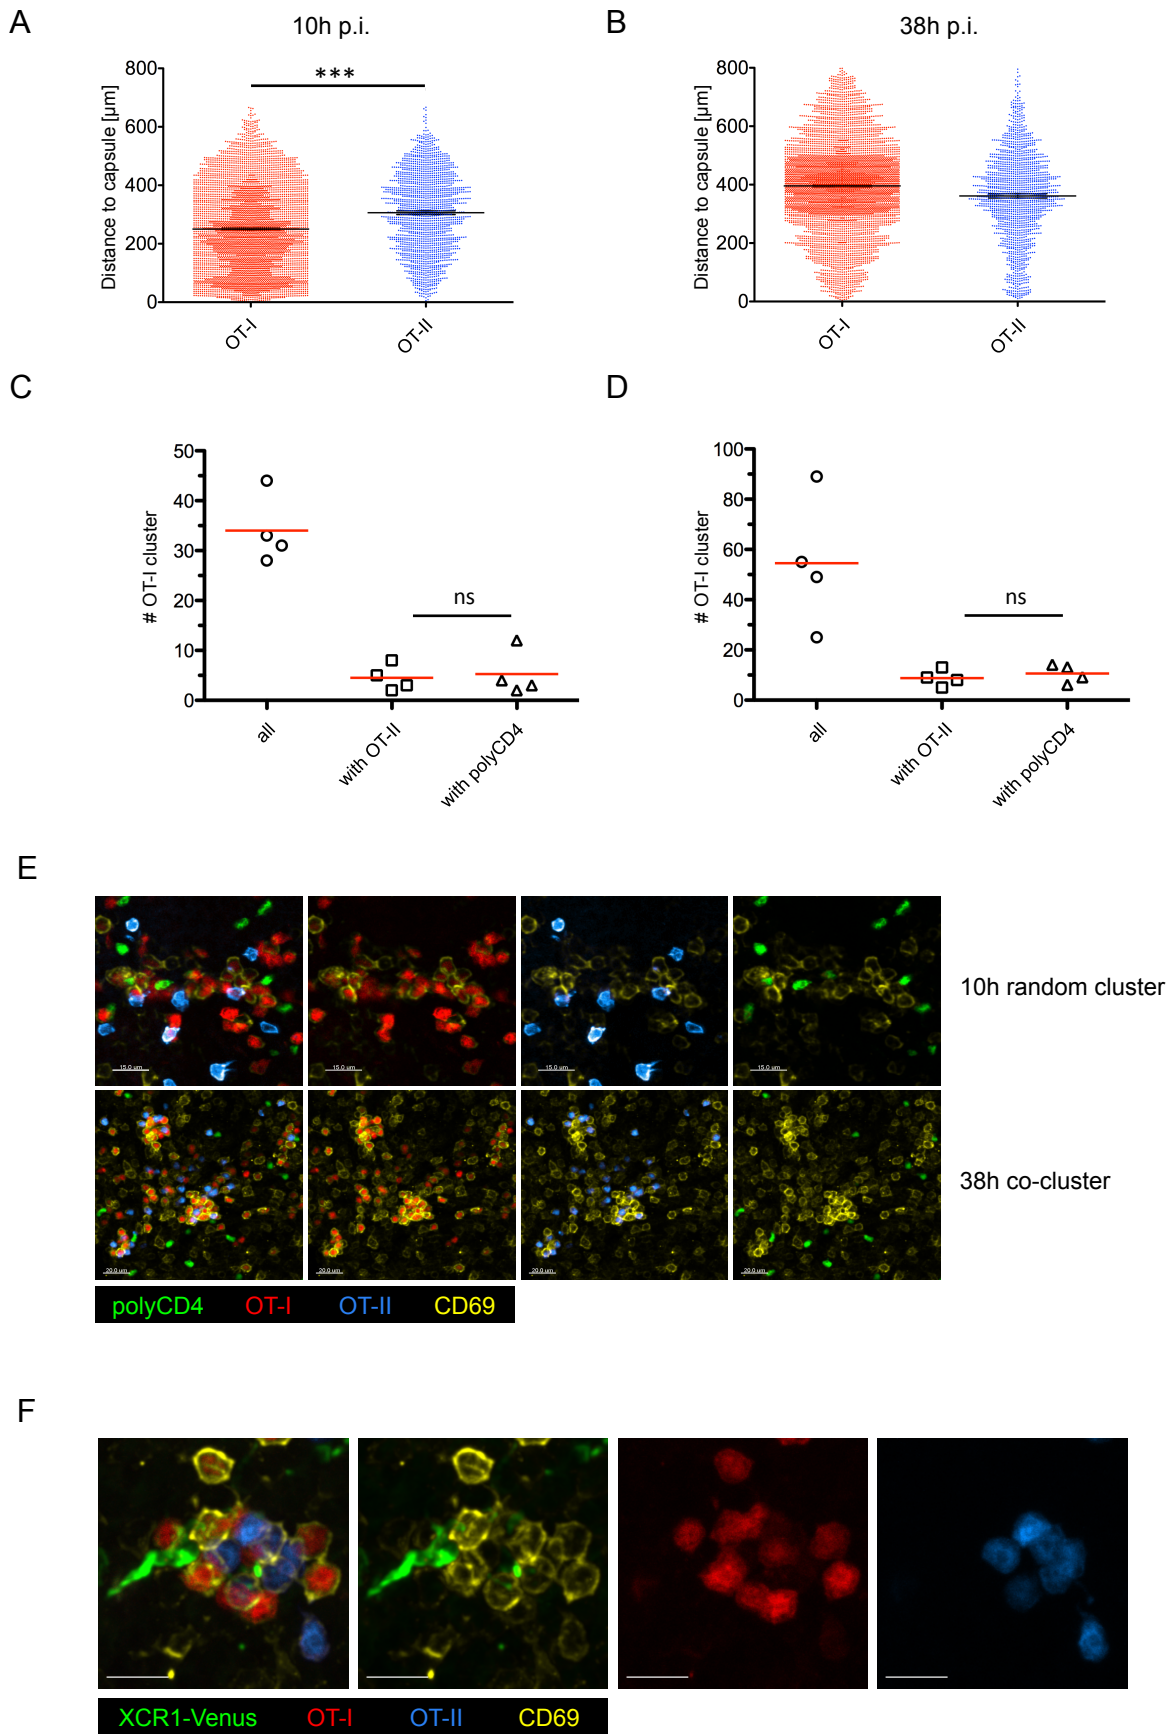

Supplement: NIHMS713704-supplement-11.pdf [file NIHMS713704-supplement-11.pdf]

Figure S6

A

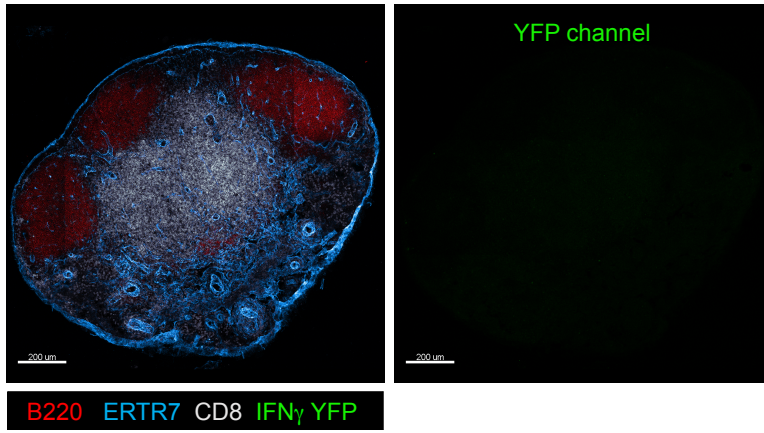

B

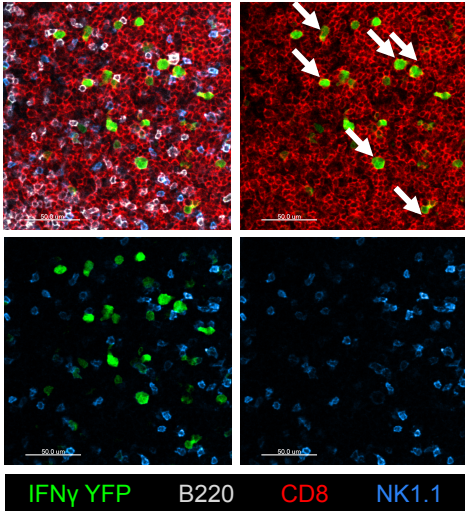

C

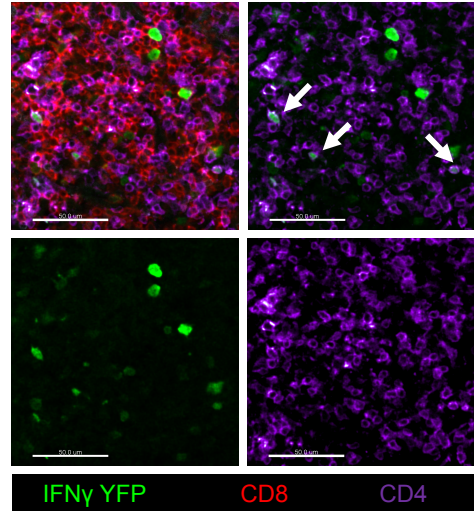

D

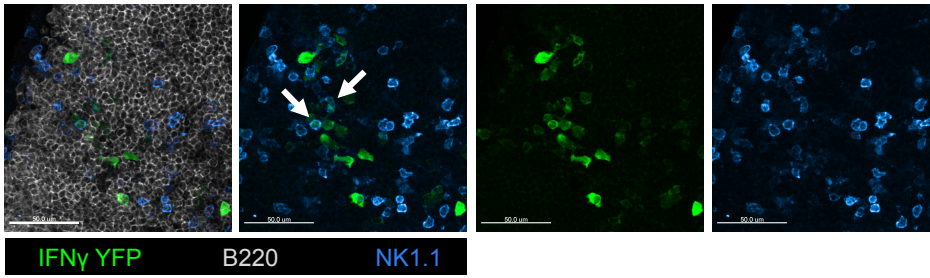

E

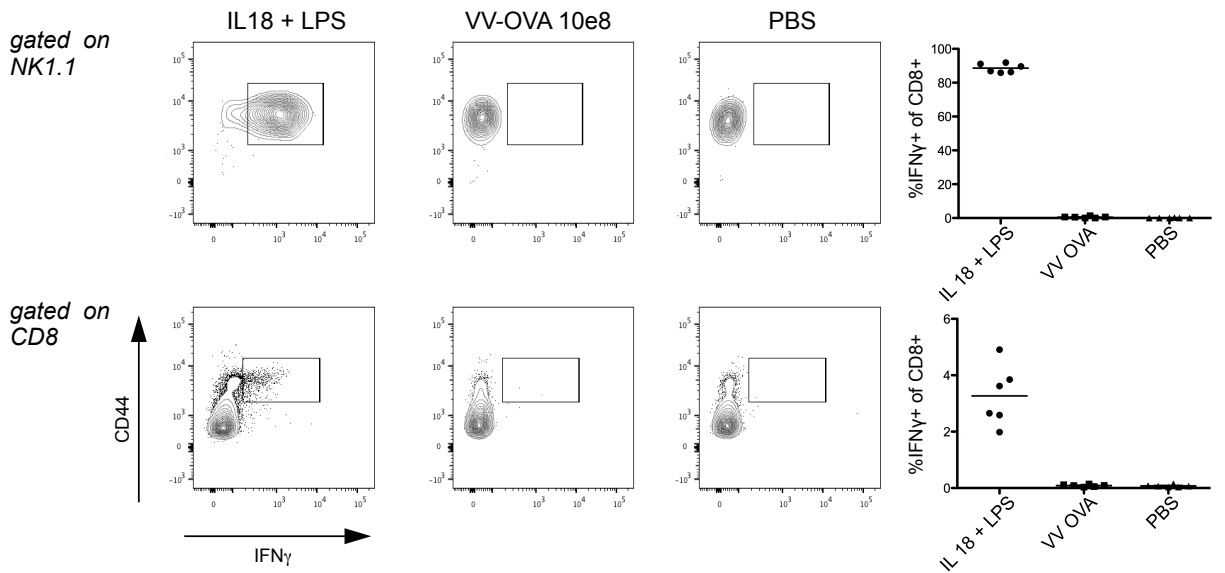

Supplement: NIHMS713704-supplement-12.pdf [file NIHMS713704-supplement-12.pdf]

Figure S7

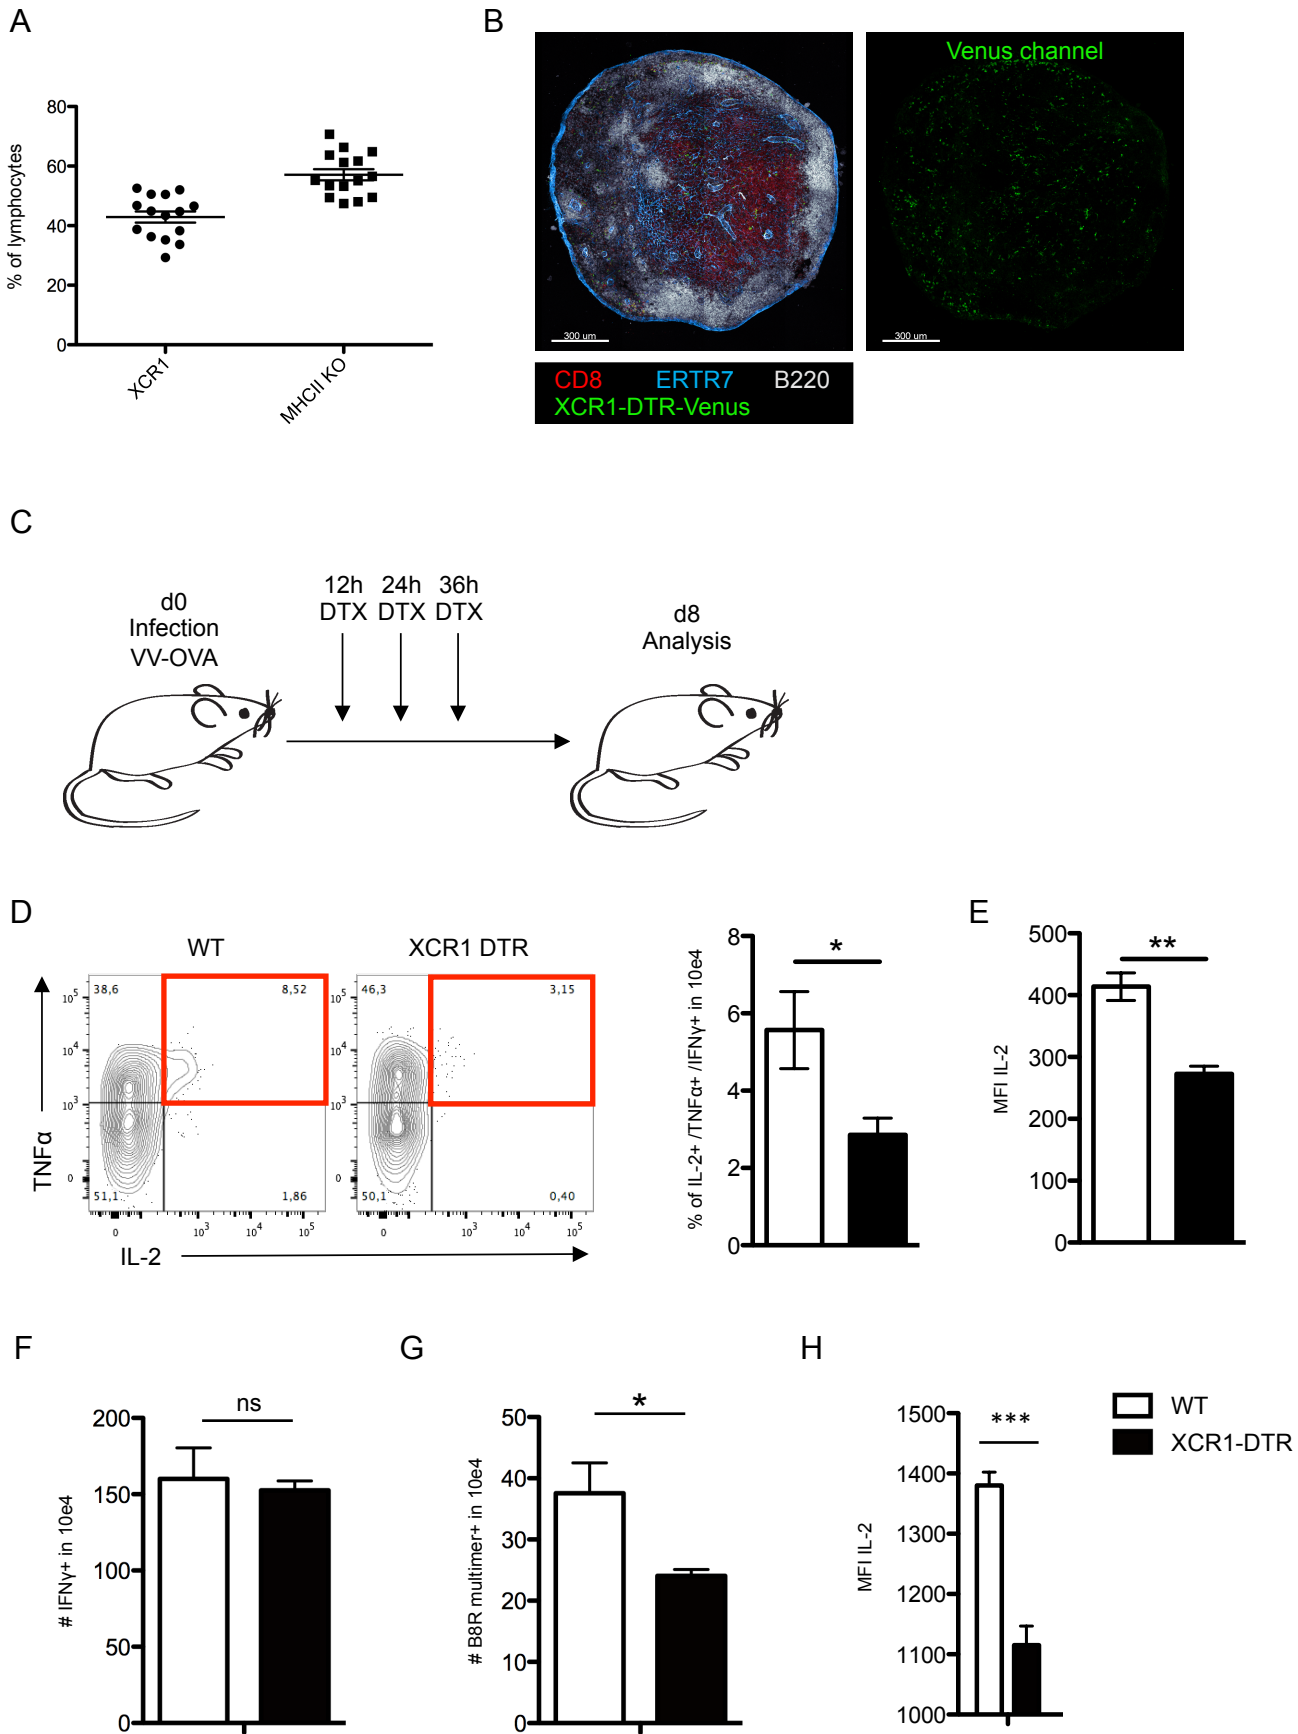

Supplement: NIHMS713704-supplement-13.pdf [file NIHMS713704-supplement-13.pdf]

Figure S1

A

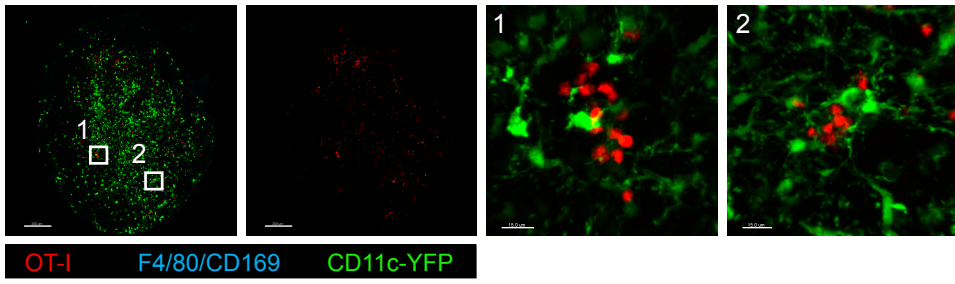

B

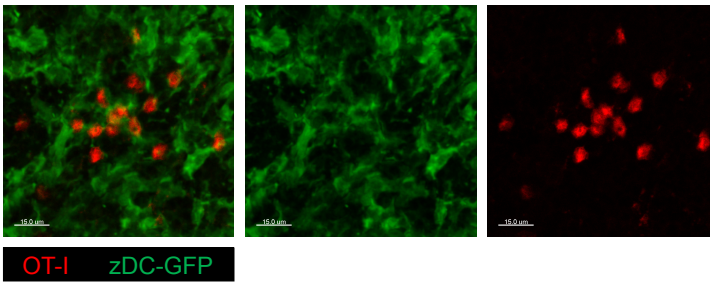

C

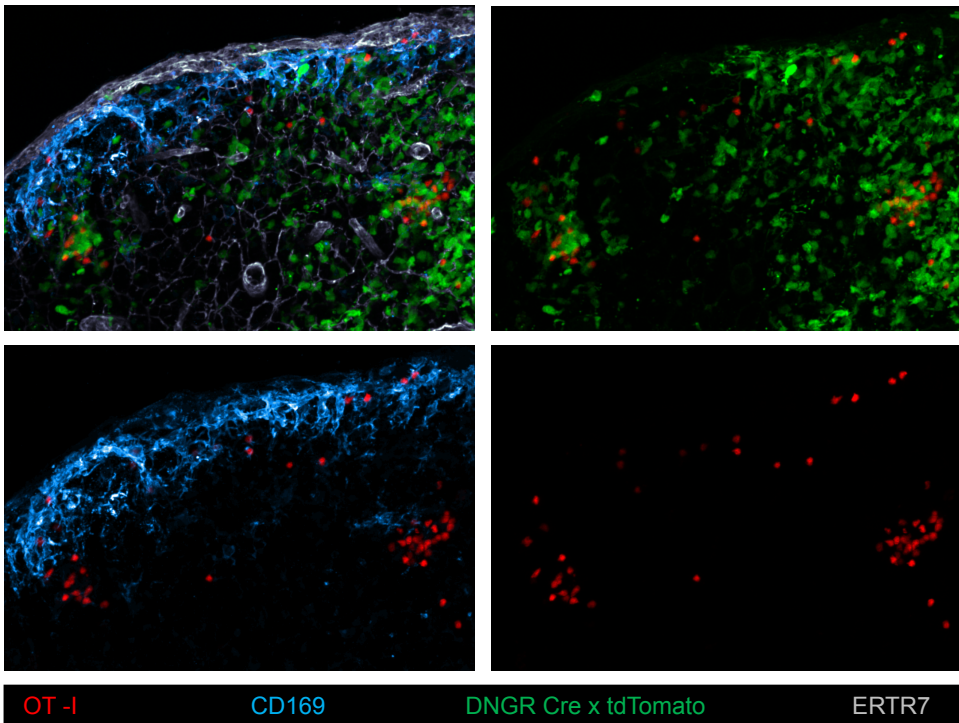

D

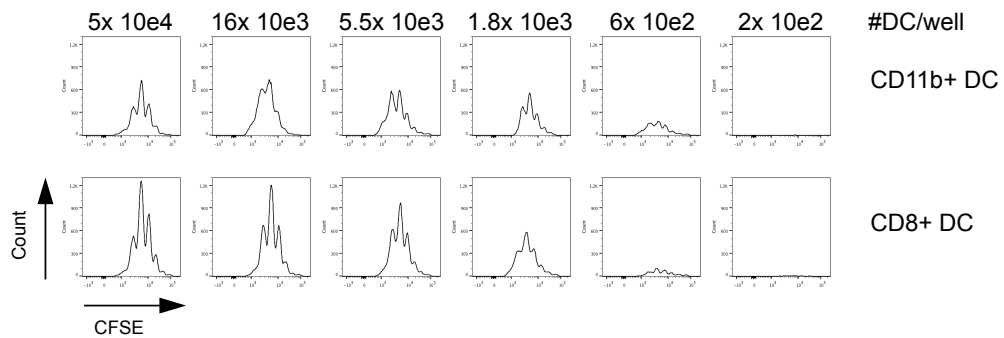

Supplement: NIHMS713704-supplement-7.pdf [file NIHMS713704-supplement-7.pdf]

Figure S2

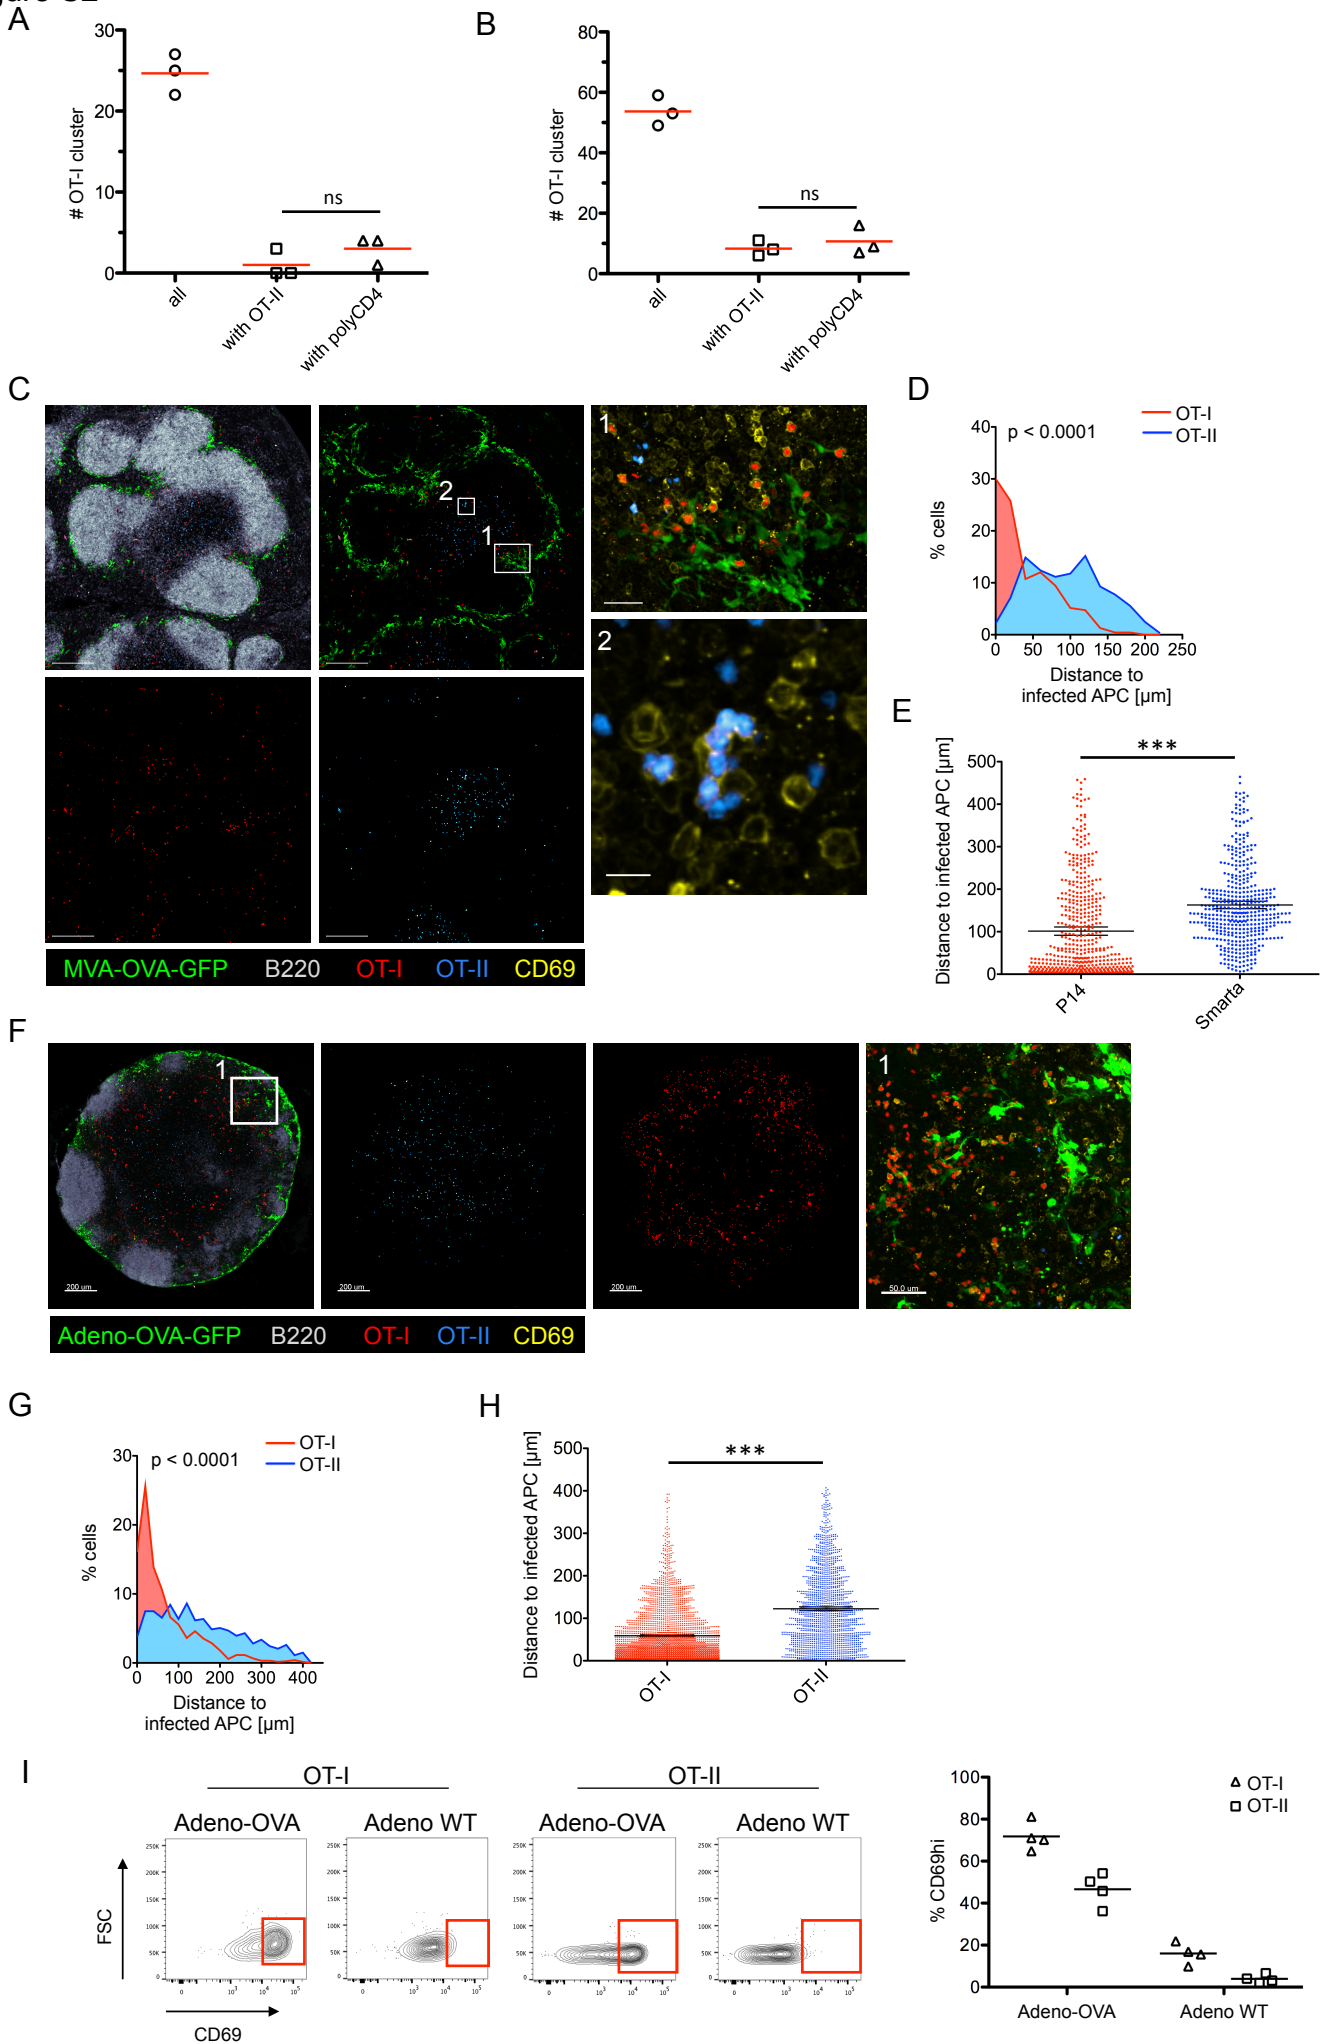

Figure S2 continued

J

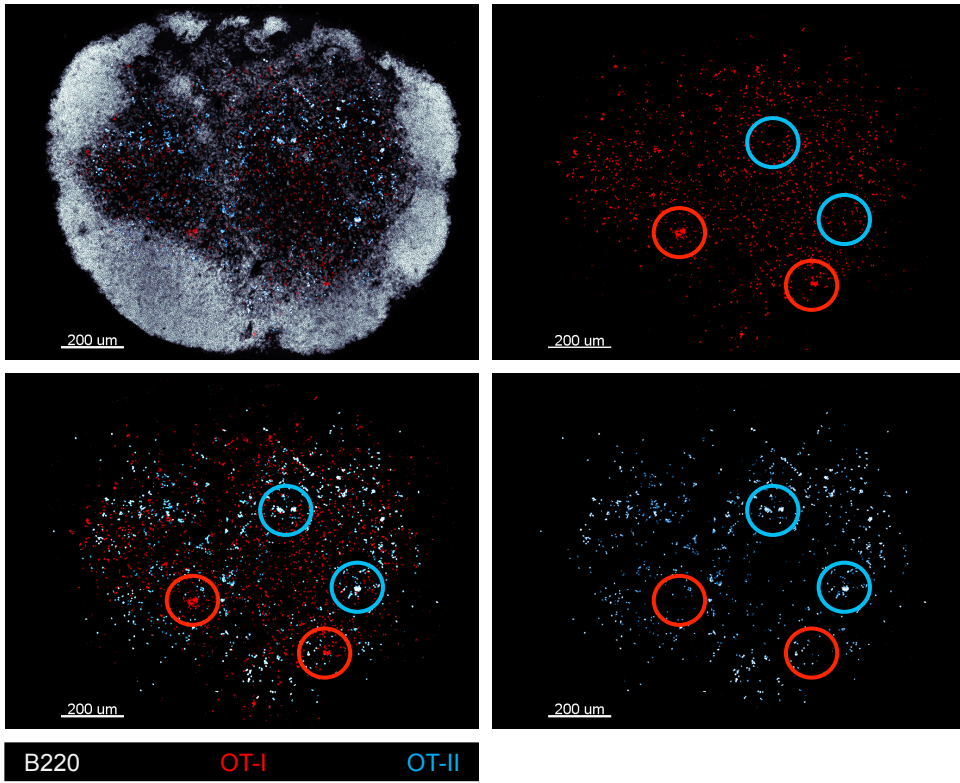

K

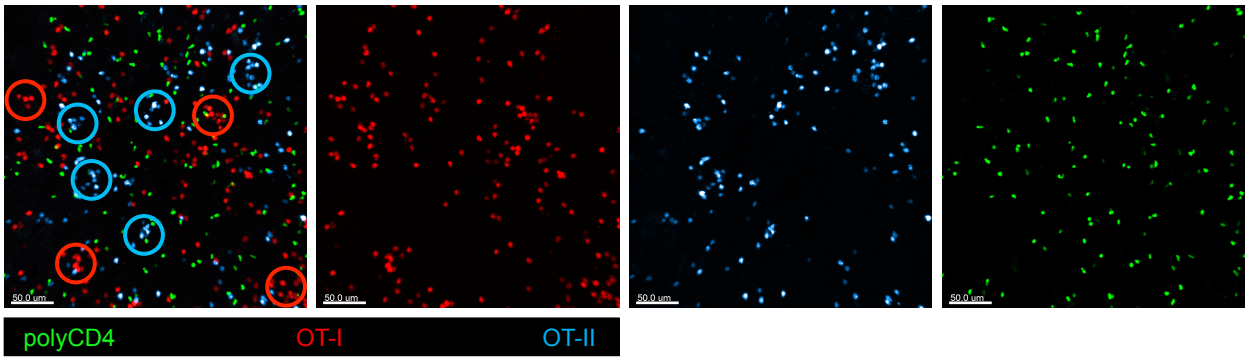

L

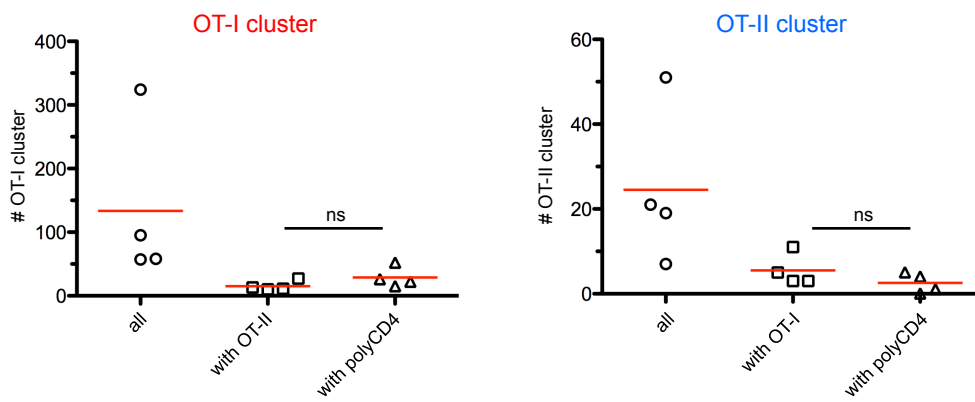

M

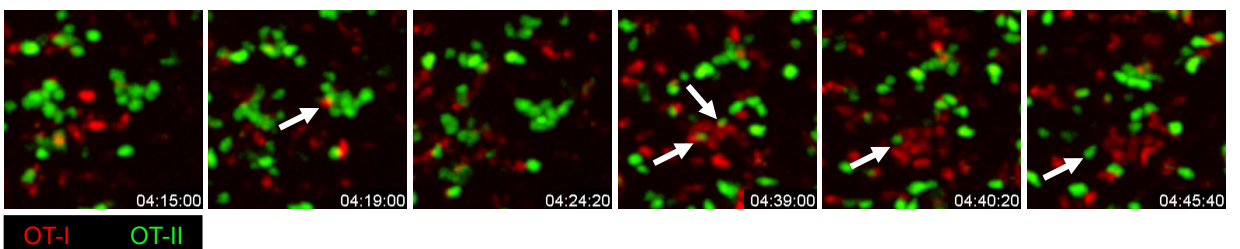

Supplement: NIHMS713704-supplement-8.pdf [file NIHMS713704-supplement-8.pdf]

Figure S3

A

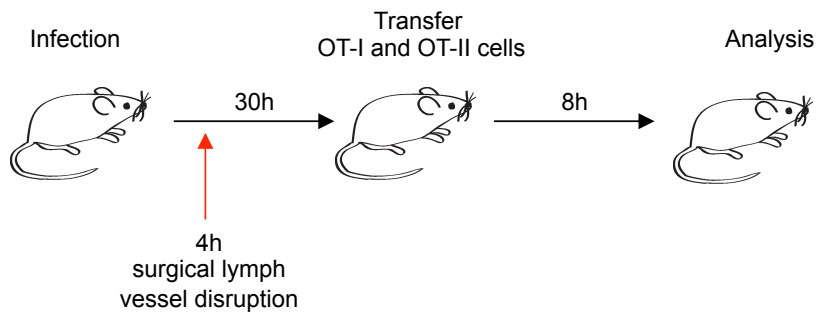

B

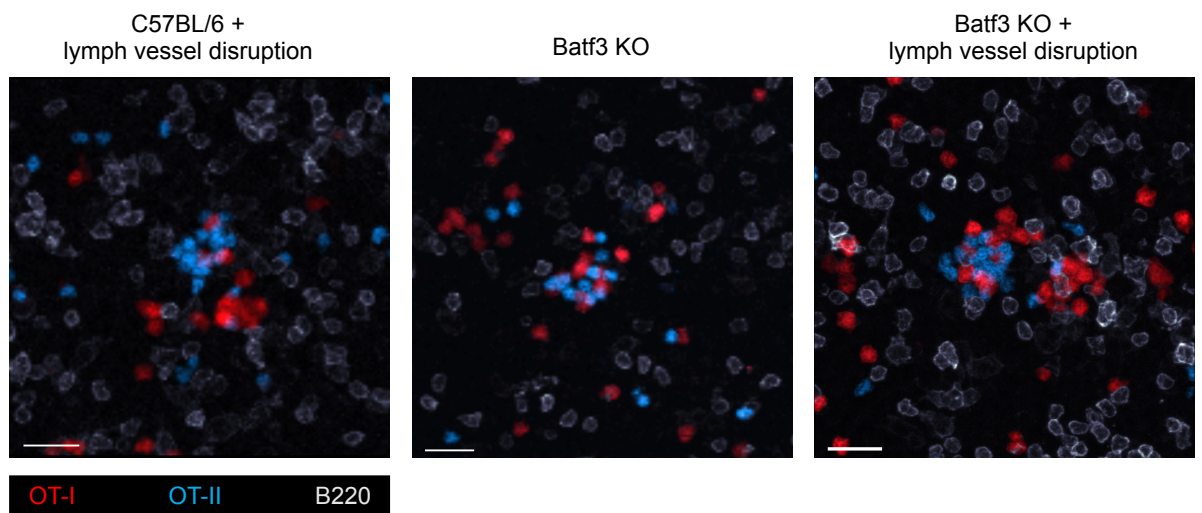

Supplement: NIHMS713704-supplement-9.pdf [file NIHMS713704-supplement-9.pdf]
